# Supplementary material
Source: PubMed Central journal article supplement (PMC4116115)
Supplement: Supp_Fig1.pdf [file Supp_Fig1.pdf]

## Supplementary Data

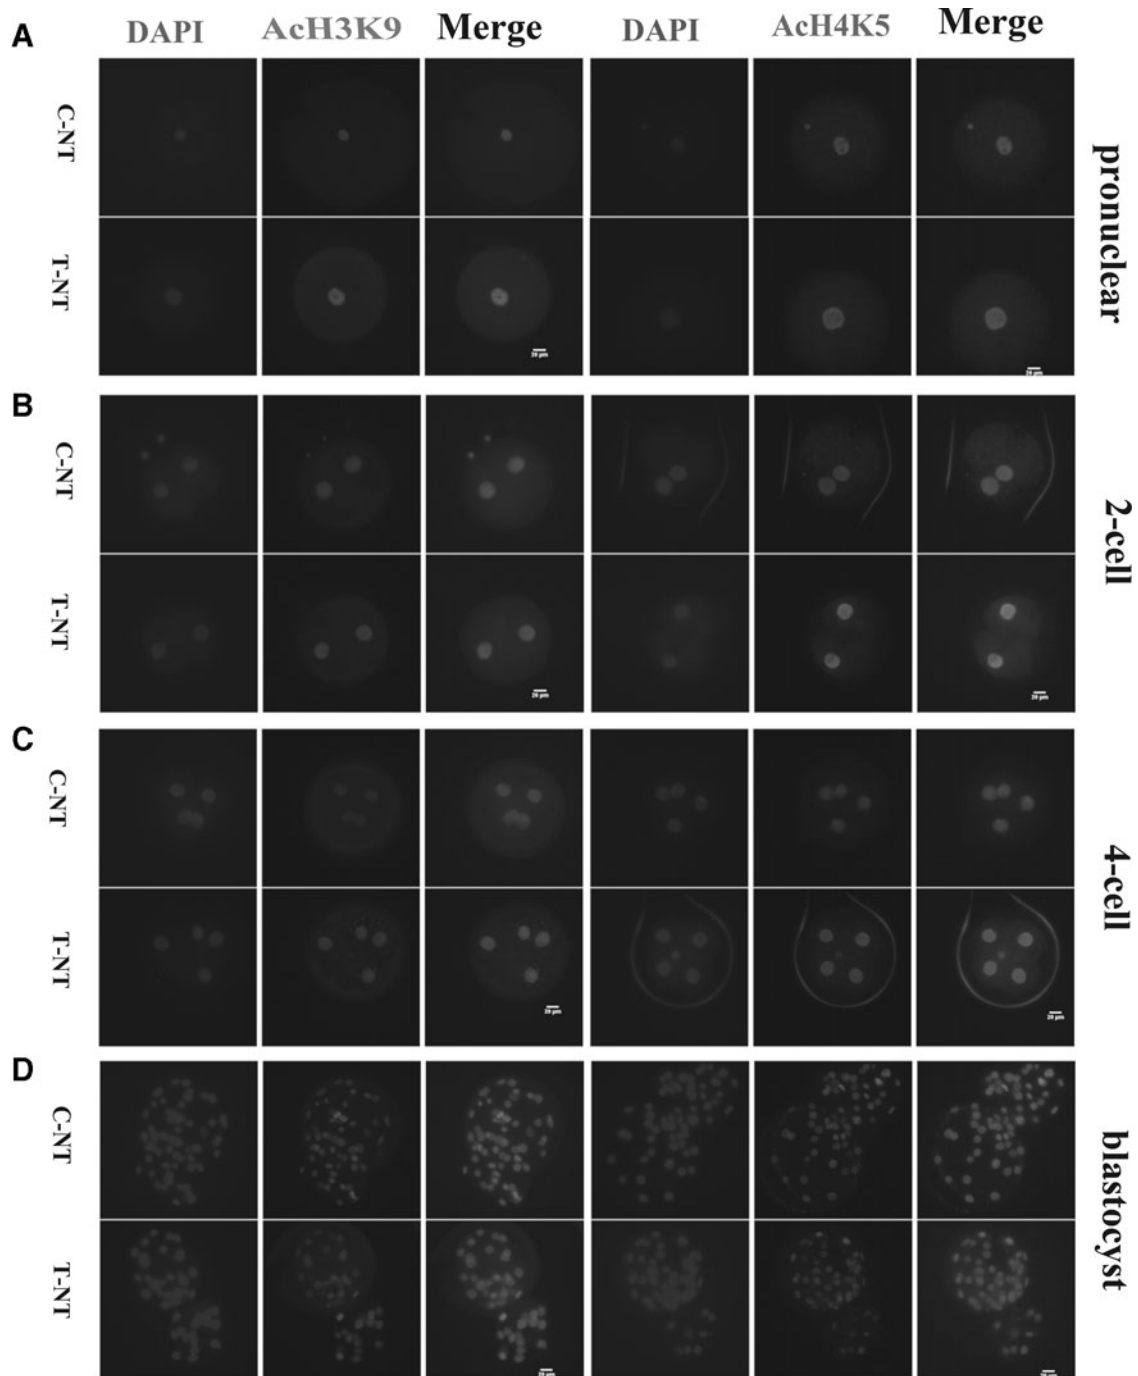

**SUPPLEMENTARY FIG. S1.** Acetylation levels of AcH3K9 and AcH4K5 at the pronuclear (15 h postactivation), two-cell, four-cell, and blastocyst stages of porcine SCNT embryos in C-NT and T-NT groups. T-NT, SCNT embryos treated with 1  $\mu$ M oxamflatin for 15 h postactivation; C-NT, nontreated SCNT embryos. The experiments were repeated three times, and each replication included at least 10–15 embryos. Representative examples are shown. Scale bar, 20  $\mu$ m.
