# Supplementary material
Source: PubMed Central journal article supplement (PMC4116115)
Supplement: Supp_Table1.pdf [file Supp_Table1.pdf]

SUPPLEMENTARY TABLE S1. PRIMER SEQUENCES FOR REAL-TIME PCR

| <i>Genes (porcine)</i> | <i>Primer sequences (5' → 3')</i>                     | <i>Length of amplicon (bp)</i> | <i>Refercene gene ID (mouse)</i> | <i>Identity of amplicon with reference gene ID</i> |
|------------------------|-------------------------------------------------------|--------------------------------|----------------------------------|----------------------------------------------------|
| <i>HDAC1</i>           | F: AGTGCGGTCTGCTTACAG<br>R: CCTCCCAGCATCAACATA        | 137                            | NM_008228                        | 90%                                                |
| <i>HDAC2</i>           | F: GGAACAGGAGACTTGAGGGAT<br>R: CAGCACCACATTGTAACACGAC | 172                            | NM_008229                        | 88%                                                |
| <i>HDAC3</i>           | F: GCTGCTGGACGGATGAGA<br>R: CTGGATGGAGCGTGAAGT        | 108                            | NM_001243827.1                   | 99%                                                |
| <i>HDAC4</i>           | F: TCAAGGCACCCGAGAAGA<br>R: ACGACGGAGACAAACAGACAAG    | 102                            | NM_207225                        | 79%                                                |
| <i>HDAC5</i>           | F: AACTCTGTAGCCATCACAACCA<br>R: CCCTCCGCCAACCCTT      | 204                            | NM_001077696                     | 91%                                                |
| <i>HDAC6</i>           | F: CCGCCCGAAGTGTAAT<br>R: AGACCTGCCAGTCATCCC          | 187                            | XM_003360315                     | 99%                                                |
| <i>HDAC7</i>           | F: GGGCTGTGGATGAGTTGGGA<br>R: CATTGGCGGAGACACGGTAG    | 232                            | NM_001204275                     | 86%                                                |
| <i>HDAC8</i>           | F: CTCCAGAAAGTCAGCCAAGA<br>R: TTCCGTCGCAATCGTAAT      | 269                            | NM_027382                        | 95%                                                |
| <i>HDAC9</i>           | F: AGCCCATCTCGCCTTTA<br>F: TTGCTGCGGTTGCTGAAT         | 119                            | NM_001271386                     | 90%                                                |
| <i>HDAC10</i>          | R: GCCGTCTACTTCCACCCG<br>F: GCACAACCTCCCGCCATC        | 94                             | NM_199198                        | 79%                                                |
| <i>HDAC11</i>          | R: GGC GGCTTCCACCATT<br>F: ATACCTTCCACTCGCTCTAA       | 101                            | NM_144919                        | 90%                                                |

The primers of *POU5F1*, *SOX2*, *KLF4*,  $\beta$ -*actin* for q-PCR were synthesized according to previous reports (Huang et al., 2011). For *Sirt1*, *Sirt2*, please refer to the literature (Jin et al., 2009) and *DNMT1*, *DNMT2*, *DNMT3a*, *DNMT3b*, please see previously published data (Kumar et al., 2012) for primers and amplicons information.  
F, forward; R, reverse.
