# Supplementary material
Source: PubMed Central journal article supplement (PMC4116115)
Supplement: Supp_Table2.pdf [file Supp_Table2.pdf]

SUPPLEMENTARY TABLE S2. EFFECT OF OXAMFLATIN TREATMENT CONCENTRATION ON *IN VITRO* DEVELOPMENT OF PORCINE SCNT EMBRYOS

| <i>Treatment</i> | <i>No. reconstructed</i> | <i>replications</i> | <i>Rate. (%)<br/>≥2-cell embryos</i> | <i>Rate. (%)<br/>≥4-cell embryos</i> | <i>Rate (%)<br/>blastocysts</i> |
|------------------|--------------------------|---------------------|--------------------------------------|--------------------------------------|---------------------------------|
| 0 $\mu$ M        | 94                       | 3                   | 60 (63.8) <sup>a</sup>               | 44 (46.8) <sup>a</sup>               | 11 (11.7) <sup>a</sup>          |
| 0.01 $\mu$ M     | 89                       | 3                   | 56 (62.9) <sup>a</sup>               | 41 (46.1) <sup>a</sup>               | 12 (13.5) <sup>a</sup>          |
| 0.1 $\mu$ M      | 132                      | 4                   | 91 (68.9) <sup>a</sup>               | 67 (50.8) <sup>a</sup>               | 22 (16.7) <sup>a</sup>          |
| 1 $\mu$ M        | 157                      | 5                   | 103 (65.6) <sup>a</sup>              | 81 (51.6) <sup>a</sup>               | 37 (23.6) <sup>b</sup>          |
| 10 $\mu$ M       | 92                       | 3                   | 47 (51.1) <sup>b</sup>               | 22 (23.9) <sup>b</sup>               | 4 (4.3) <sup>c</sup>            |

Experiments were replicated three to five times. Data are presented as a synthesis of all experimental replicates; therefore, no error terms are associated with the data points (Isom et al., 2012). Different superscript letters in one line indicate significant differences at  $p < 0.05$ .
